# Supplementary material for: Aloe vera assisted facile green synthesis of reduced graphene oxide for electrochemical and dye removal applications
Source: Royal Society of Chemistry journal article supplement (doi:10.1039/c7ra02828h), 2017-01-01
Supplement: c7ra02828h1.pdf [file c7ra02828h1.pdf]

## **Aloe-vera assisted facile green synthesis of reduced graphene oxide for improved electrochemical and dye removal applications**

**Gourav Bhattacharya<sup>a</sup>, Shrawni Sas<sup>b</sup> Shikha Wadhwa<sup>b\*</sup> Ashish Mathur<sup>b</sup>, James McLaughlin<sup>c</sup>, Susanta Sinha Roy<sup>a\*</sup>**

---

<sup>a</sup>Department of Physics, School of Natural Sciences, Shiv Nadar University, Gautam Buddha Nagar 201314, Uttar Pradesh, India.

<sup>b</sup>Amity Institute of Nanotechnology, Amity University Uttar Pradesh, Noida-201313, India.

<sup>c</sup>Nanotechnology and Integrated Bioengineering Centre, Jordanstown Campus, University of Ulster, Newtownabbey, BT37 OQB, Northern Ireland, United Kingdom.

\*E-mail: susanta.roy@snu.edu.in

Electronic Supplementary Information (EIS) available

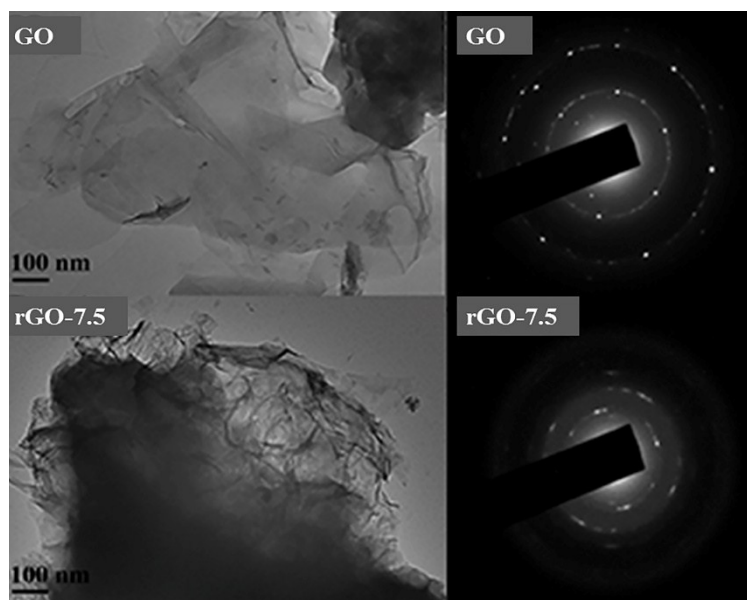

**Fig. S1.** TEM images of GO (top left) and rGO-7.5 samples (bottom left). The corresponding SAED patterns are represented in the right side.

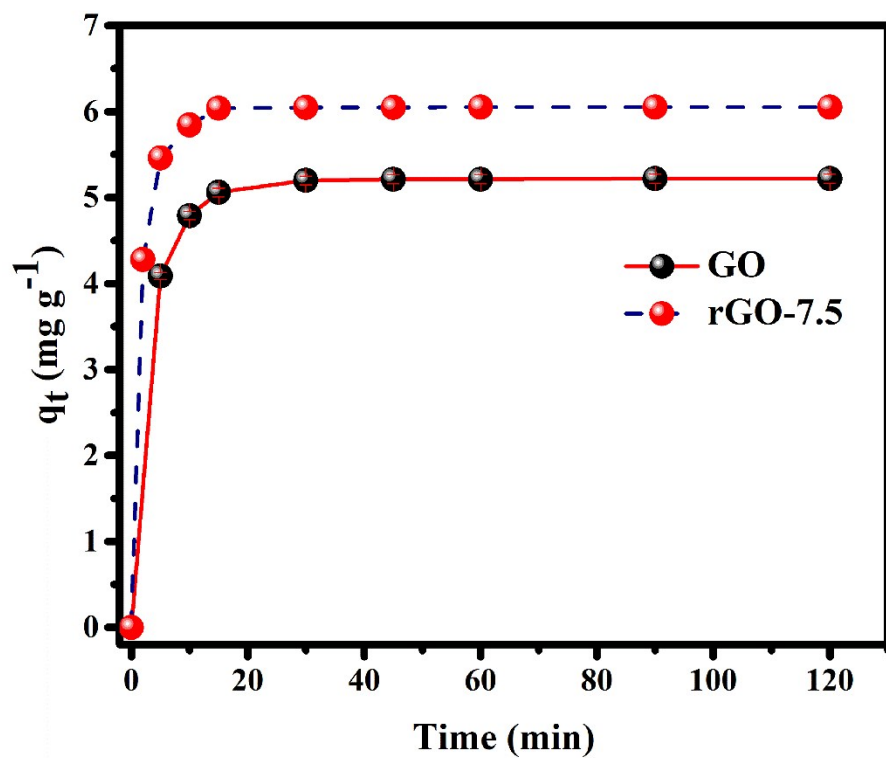

Fig. S2. Adsorption capacity of Methylene blue over GO and rGO-7.5.

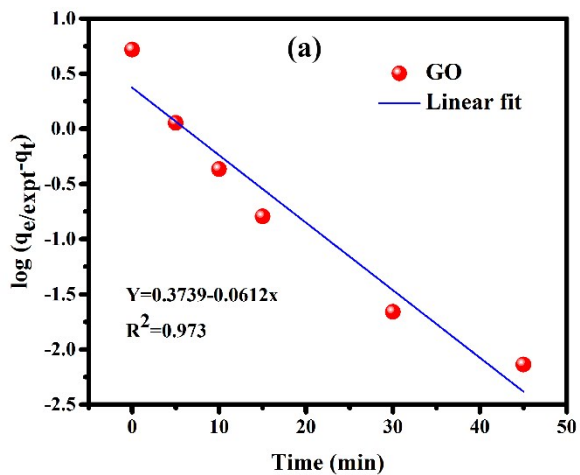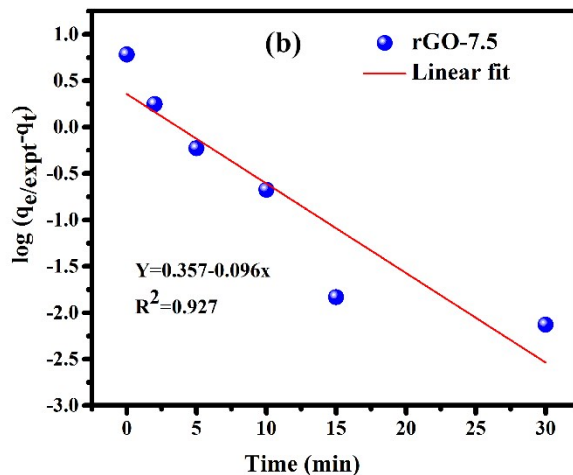

Fig. S3. Plot of  $\log(q_e/\text{expt}-q_e)$  vs. time for adsorption of MB over (a) GO (b.) rGO-7.5.

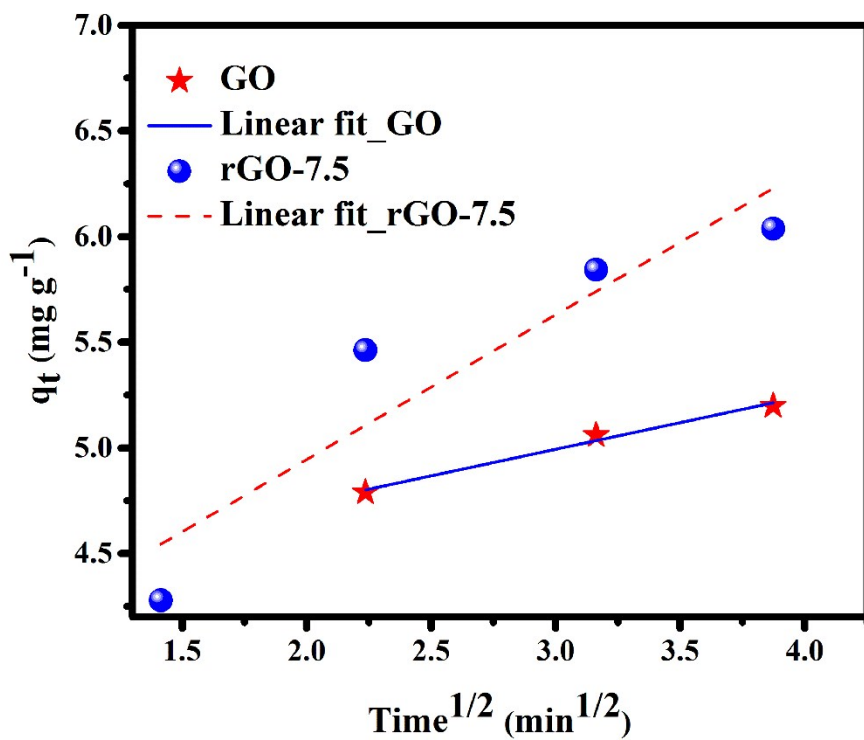

Fig. S4. Plot of  $q_t$  vs.  $t^{1/2}$  for adsorption of MB over GO and rGO-7.5.

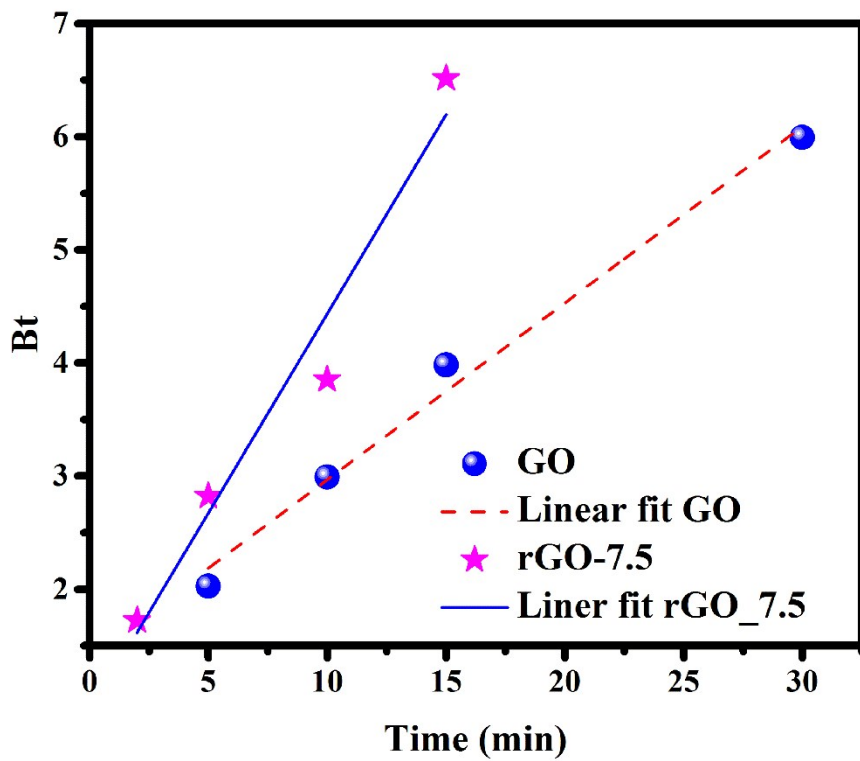

Fig. S5. Plot of  $Bt$  vs.  $t$  for adsorption of MB over GO and rGO-7.5.
